# Supplementary material for: Highly efficient blue and deep-blue emitting zwitterionic iridium(iii) complexes: synthesis, photophysics and electroluminescence
Source: Royal Society of Chemistry journal article supplement (doi:10.1039/c3tc32181a), 2014-01-01
Supplement: c3tc32181a.pdf [file c3tc32181a.pdf]

## Electronic Supplementary Information

for

# Highly efficient blue and deep-blue emitting zwitterionic iridium(III) complexes: synthesis, photophysics and electroluminescence

Noviyan Darmawan,<sup>a,b,#</sup> Cheng Han Yang,<sup>b</sup> Matteo Mauro,<sup>b,#</sup> Roland Fröhlich,<sup>c</sup> Luisa De Cola,<sup>\*,a,b,#</sup> Chih-Hao Chang,<sup>\*,d</sup> Zih-Jyun Wu,<sup>d</sup> and Cheng-Wei Tai<sup>d</sup>

<sup>a</sup> NRW Graduate School of Chemistry, University of Münster, Heisenbergstrasse 11, 48149 Münster, Germany

<sup>b</sup> Physikalisches Institut, Center for Nanotechnology (CeNTech), University of Münster, Heisenbergstrasse 11, 48149 Münster, Germany

<sup>c</sup> Organisch-Chemisches Institut, Corrensstrasse 40, 48149 Münster, Germany

<sup>d</sup> Department of Photonics Engineering, Yuan Ze University, Chung-Li 32003, Taiwan.

<sup>#</sup> Current address: Institut de Science et d'Ingénierie Supramoléculaires (I.S.I.S.), Université de Strasbourg, 8, allée Gaspard Monge, 67083 Strasbourg, France

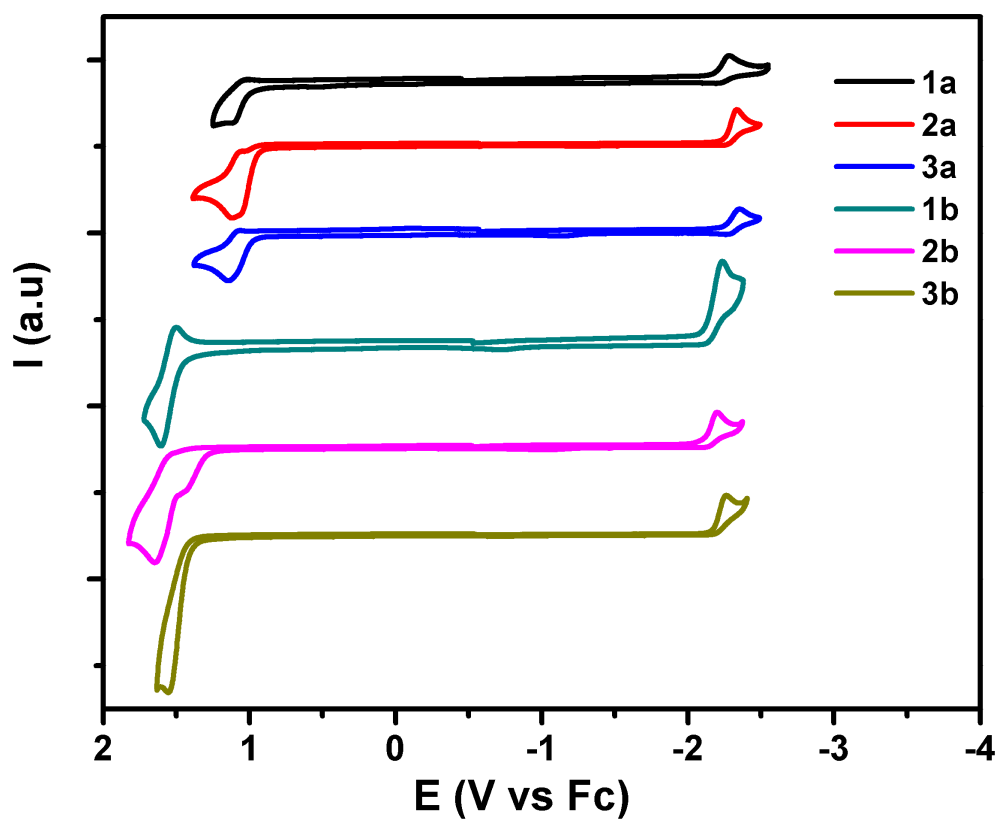

**Fig. S1.** Cyclic voltammograms of **1a–3b** (V vs Ferrocene) were collected in deaerated  $\text{CH}_3\text{CN}$  with scan rate of  $0.1 \text{ V s}^{-1}$ .

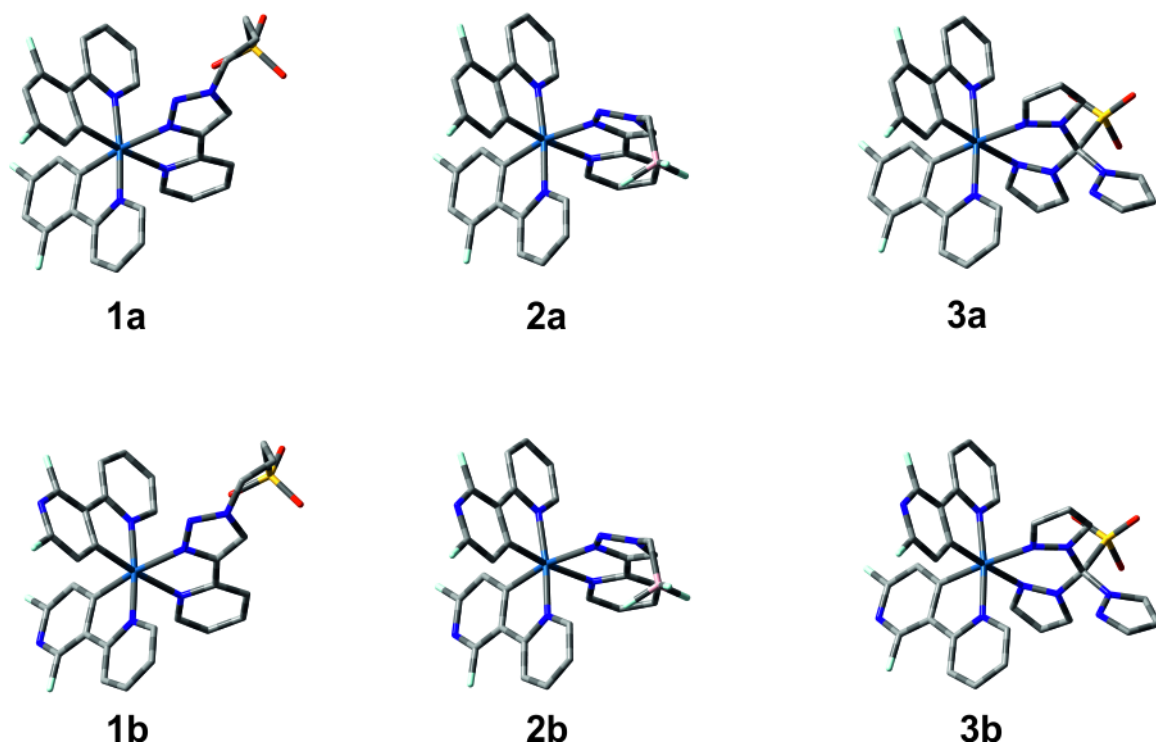

**Fig. S2.** DFT-optimized  $S_0$  geometry for complexes **1a–3b** in gas phase.

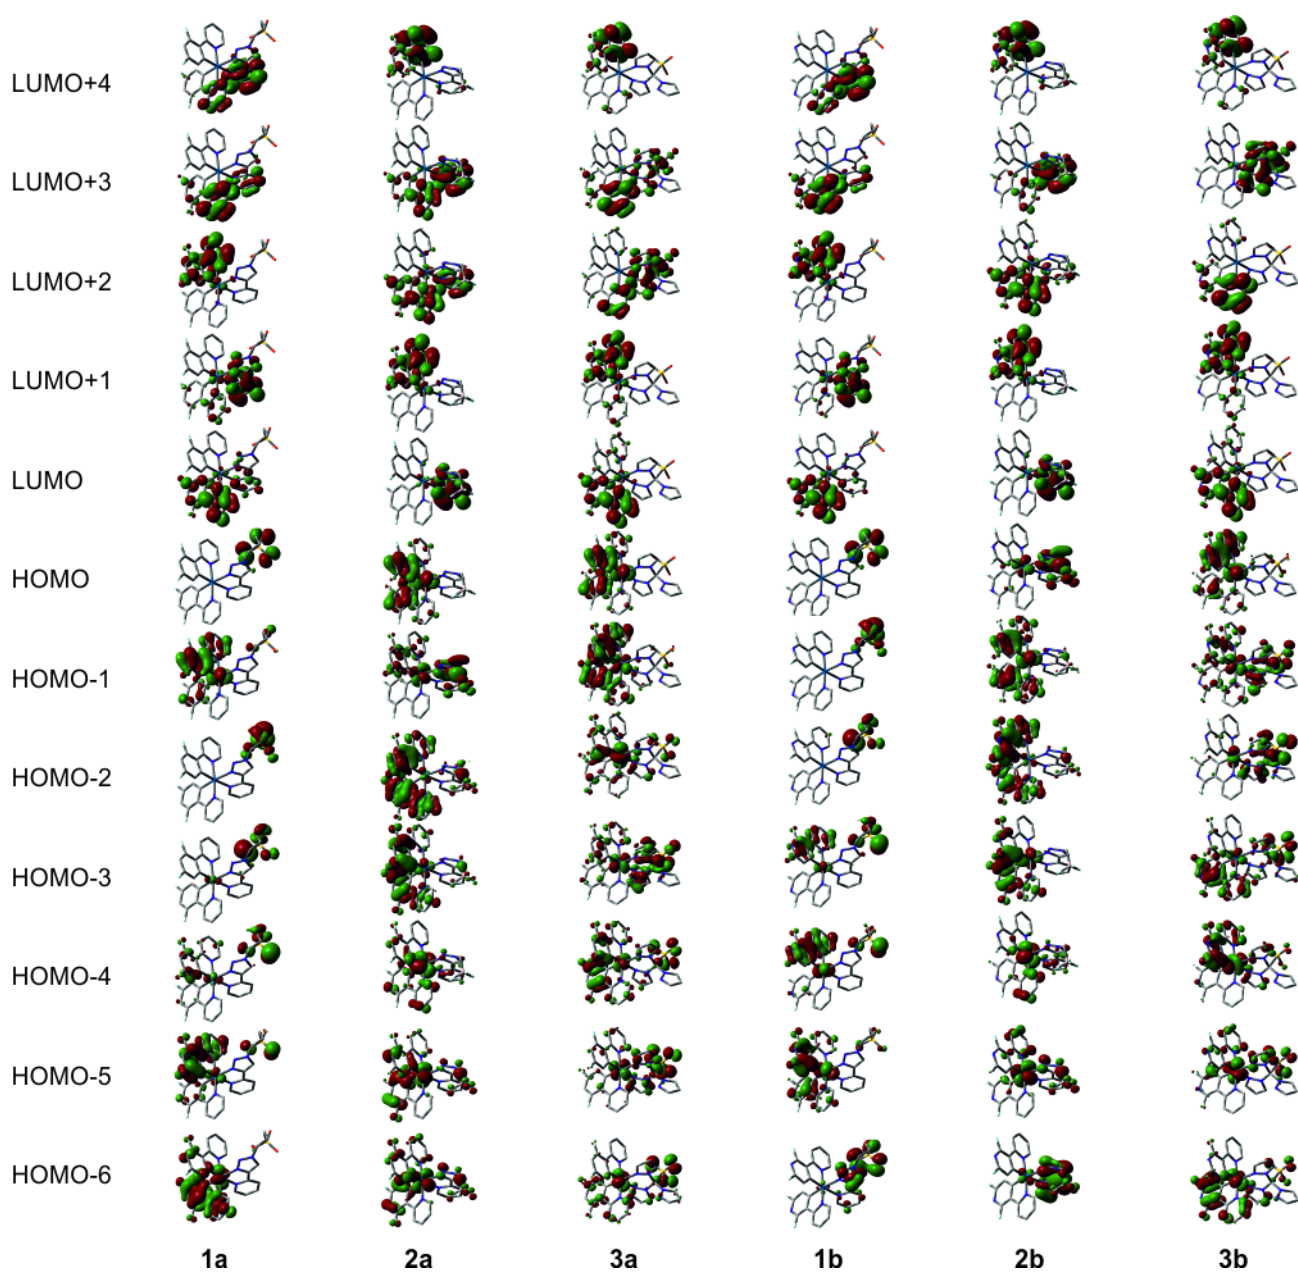

**Fig. S3.** Isodensity surface plots of some selected frontier molecular orbitals for complexes **1a–3b**, at their optimized  $S_0$  geometry in gas phase. Isodensity value  $0.035 e \text{ Bohr}^{-3}$ .

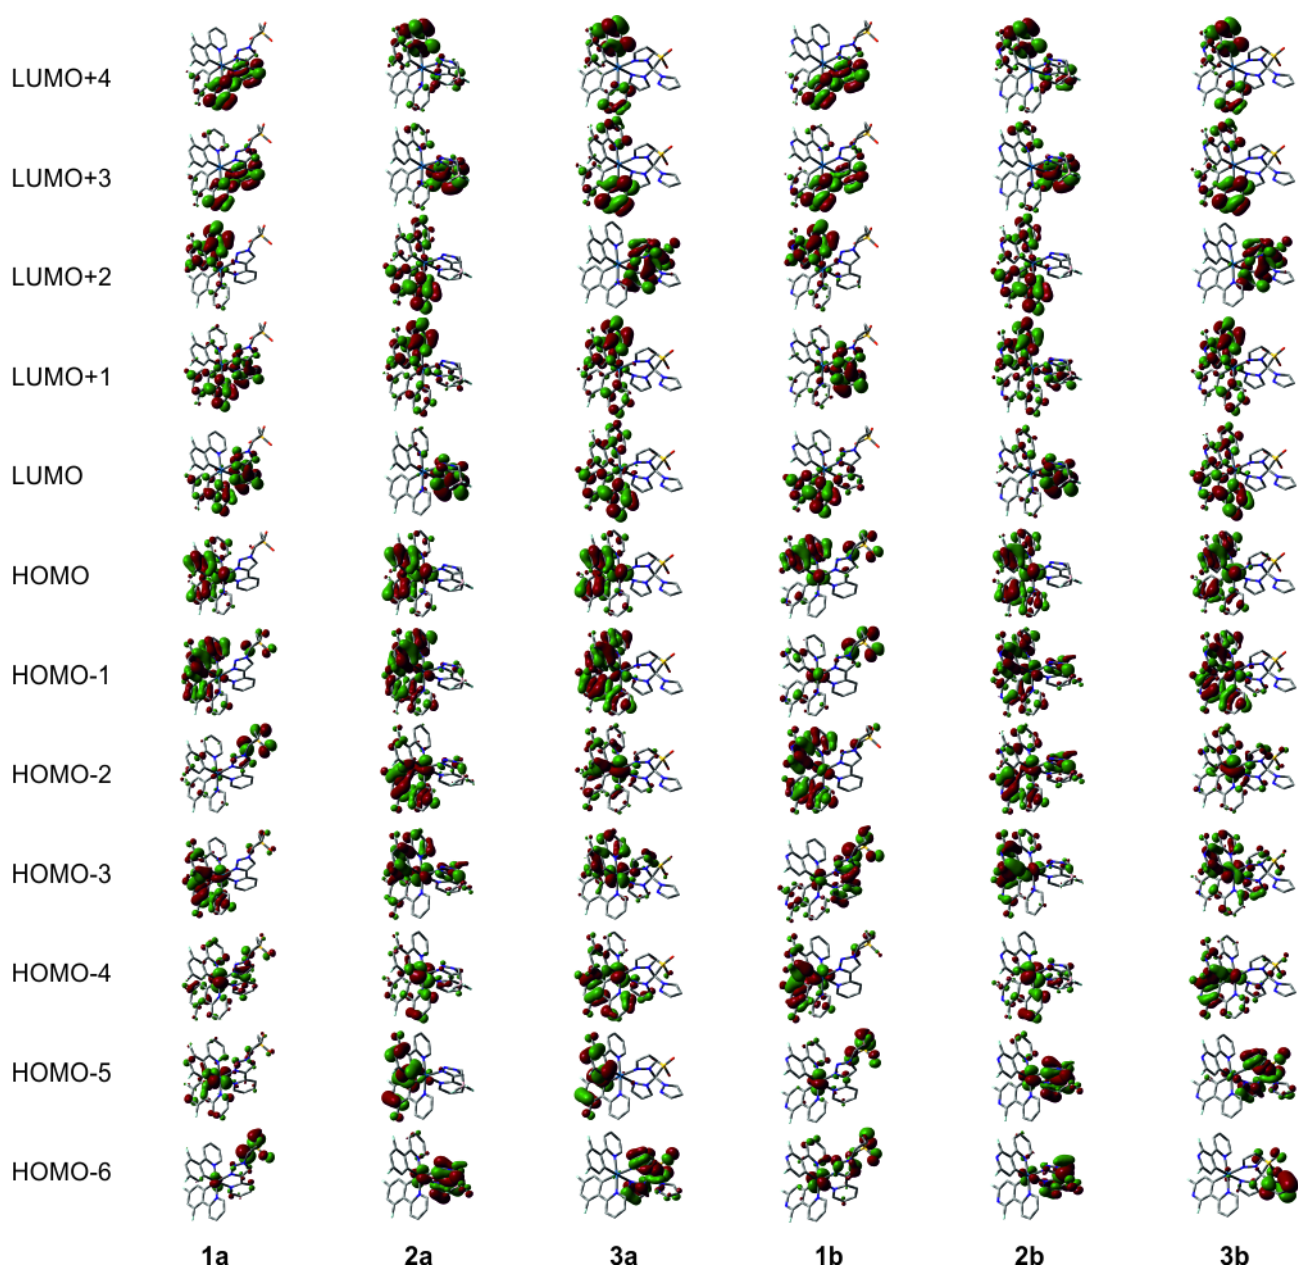

**Fig. S4.** Isodensity surface plots of some selected frontier molecular orbitals for complexes **1a–3b**, obtained as single point calculations in dichloromethane, at their optimized  $S_0$  geometry in gas phase. Isodensity value  $0.035 e \text{ Bohr}^{-3}$ .

**Table S1.** Crystallographic data and structure refinements for **1a**, **2a** and **2b**.

|                                   | <b>1a</b>                                                                         | <b>2a</b>                                                                      | <b>2b</b>                                                                                                         |
|-----------------------------------|-----------------------------------------------------------------------------------|--------------------------------------------------------------------------------|-------------------------------------------------------------------------------------------------------------------|
| Empirical formula                 | C <sub>34</sub> H <sub>26</sub> F <sub>4</sub> Ir N <sub>7</sub> O <sub>3</sub> S | C <sub>30</sub> H <sub>19</sub> B F <sub>7</sub> Ir N <sub>6</sub>             | C <sub>28</sub> H <sub>23</sub> B F <sub>7</sub> Ir N <sub>10</sub>                                               |
| Formula weight                    | 880.88                                                                            | 799.52                                                                         | 807.52                                                                                                            |
| Temperature                       | 223(2) K                                                                          | 223(2) K                                                                       | 223(2) K                                                                                                          |
| Wavelength                        | 0.71073 Å                                                                         | 1.54178 Å                                                                      | 0.71073 Å                                                                                                         |
| Crystal system, space group       | monoclinic, P <sub>21</sub> /c (No.14)                                            | monoclinic, P <sub>21</sub> /c (No.14)                                         | triclinic, P-1 (No.2)                                                                                             |
| Unit cell dimensions              | a = 22.5873(5) Å<br>b = 16.4337(4) Å<br>c = 8.5110(2) Å<br><br>β = 97.541(1)°     | a = 9.6660(3) Å<br>b = 23.6037(8) Å<br>c = 12.8285(4) Å<br><br>β = 101.336(2)° | a = 8.6423(1) Å<br>b = 13.1265(2) Å<br>c = 14.9287(2) Å<br><br>α = 75.465(1)°<br>β = 79.891(1)°<br>γ = 88.149(1)° |
| Volume                            | 3131.90(13) Å <sup>3</sup>                                                        | 2869.77(16) Å <sup>3</sup>                                                     | 1613.78(4) Å <sup>3</sup>                                                                                         |
| Z, Calculated density             | 4, 1.868 Mg/m <sup>3</sup>                                                        | 4, 1.851 Mg/m <sup>3</sup>                                                     | 2, 1.818 Mg/m <sup>3</sup>                                                                                        |
| Absorption coefficient            | 4.404 mm <sup>-1</sup>                                                            | 9.712 mm <sup>-1</sup>                                                         | 4.219 mm <sup>-1</sup>                                                                                            |
| F(000)                            | 1728                                                                              | 1544                                                                           | 860                                                                                                               |
| Crystal size                      | 0.30 x 0.20 x 0.07 mm                                                             | 0.30 x 0.15 x 0.10 mm                                                          | 0.40 x 0.12 x 0.10 mm                                                                                             |
| Theta range for data collection   | 4.14 to 27.78°                                                                    | 3.98 to 68.00°                                                                 | 4.10 to 27.90°                                                                                                    |
| Limiting indices                  | -29 ≤ h ≤ 29,<br>-21 ≤ k ≤ 16,<br>-11 ≤ l ≤ 11                                    | -11 ≤ h ≤ 11,<br>-27 ≤ k ≤ 28,<br>-15 ≤ l ≤ 14                                 | -11 ≤ h ≤ 11,<br>-13 ≤ k ≤ 17,<br>-16 ≤ l ≤ 19                                                                    |
| Reflections collected / unique    | 28704 / 7307 [R(int) = 0.045]                                                     | 20569 / 5092 [R(int) = 0.047]                                                  | 13509 / 7432 [R(int) = 0.043]                                                                                     |
| Completeness to theta = 29.99     | 98.8 %                                                                            | 97.3 %                                                                         | 96.2 %                                                                                                            |
| Absorption correction             | Semi-empirical from equivalents                                                   | Semi-empirical from equivalents                                                | Semi-empirical from equivalents                                                                                   |
| Max. and min. transmission        | 0.7480 and 0.3517                                                                 | 0.4434 and 0.1587                                                              | 0.6777 and 0.2831                                                                                                 |
| Refinement method                 | Full-matrix least-squares on F <sup>2</sup>                                       | Full-matrix least-squares on F <sup>2</sup>                                    | Full-matrix least-squares on F <sup>2</sup>                                                                       |
| Data / restraints / parameters    | 7307 / 0 / 452                                                                    | 5092 / 0 / 406                                                                 | 7432 / 0 / 462                                                                                                    |
| Goodness-of-fit on F <sup>2</sup> | 1.094                                                                             | 1.077                                                                          | 1.032                                                                                                             |
| Final R indices [I > 2σ(I)]       | R1 = 0.0315, wR <sup>2</sup> = 0.0836                                             | R1 = 0.0318, wR <sup>2</sup> = 0.0807                                          | R1 = 0.0320, wR <sup>2</sup> = 0.0842                                                                             |
| R indices (all data)              | R1 = 0.0393, wR <sup>2</sup> = 0.0916                                             | R1 = 0.0330, wR <sup>2</sup> = 0.0816                                          | R1 = 0.0334, wR <sup>2</sup> = 0.0864                                                                             |
| Largest diff. peak and hole       | 1.098 and -2.232 e.Å <sup>-3</sup>                                                | 0.980 and -0.990 e.Å <sup>-3</sup>                                             | 1.135 and -2.355 e.Å <sup>-3</sup>                                                                                |

**Table S2.** Selected geometrical parameters [pm, °] and energy [ $E_h$ ]<sup>a</sup> of the ground state optimized geometry for the complexes **1a–3b**. A partial atom labeling scheme is reported in Table 1 of the main text.

| parameter                 | 1a           | 2a           | 3a           |
|---------------------------|--------------|--------------|--------------|
| $R(\text{Ir}-\text{C}^1)$ | 202.3        | 202.6        | 202.7        |
| $R(\text{Ir}-\text{C}^2)$ | 202.7        | 202.1        | 202.8        |
| $R(\text{Ir}-\text{N}^1)$ | 209.1        | 208.6        | 208.2        |
| $R(\text{Ir}-\text{N}^2)$ | 208.2        | 208.9        | 208.7        |
| $R(\text{Ir}-\text{N}^3)$ | 224.6        | 225.0        | 221.0        |
| $R(\text{Ir}-\text{N}^4)$ | 218.6        | 217.3        | 220.1        |
| Energy                    | -2689.246700 | -2311.529444 | -2797.477081 |

| parameter                 | 1b           | 2b           | 3b           |
|---------------------------|--------------|--------------|--------------|
| $R(\text{Ir}-\text{C}^1)$ | 201.7        | 202.0        | 202.0        |
| $R(\text{Ir}-\text{C}^2)$ | 202.0        | 201.5        | 202.1        |
| $R(\text{Ir}-\text{N}^1)$ | 209.4        | 209.1        | 208.6        |
| $R(\text{Ir}-\text{N}^2)$ | 208.6        | 209.2        | 209.1        |
| $R(\text{Ir}-\text{N}^3)$ | 224.3        | 224.7        | 220.5        |
| $R(\text{Ir}-\text{N}^4)$ | 217.8        | 216.6        | 219.6        |
| Energy                    | -2721.350529 | -2343.633012 | -2829.580538 |

| parameter                                 | 1a    | 2a    | 3a    |
|-------------------------------------------|-------|-------|-------|
| $\angle(\text{C}^1-\text{Ir}-\text{N}^3)$ | 95.8  | 95.7  | 95.2  |
| $\angle(\text{C}^1-\text{Ir}-\text{N}^4)$ | 171.1 | 168.0 | 176.8 |
| $\angle(\text{C}^2-\text{Ir}-\text{N}^4)$ | 100.6 | 98.9  | 94.8  |
| $\angle(\text{C}^1-\text{Ir}-\text{C}^2)$ | 88.4  | 90.8  | 86.9  |
| $\angle(\text{N}^1-\text{Ir}-\text{N}^2)$ | 174.5 | 174.1 | 173.7 |
| $\angle(\text{N}^3-\text{Ir}-\text{N}^4)$ | 75.3  | 74.9  | 83.1  |

| parameter                                 | 1b    | 2b    | 3b    |
|-------------------------------------------|-------|-------|-------|
| $\angle(\text{C}^1-\text{Ir}-\text{N}^3)$ | 95.9  | 95.9  | 95.2  |
| $\angle(\text{C}^1-\text{Ir}-\text{N}^4)$ | 171.3 | 168.2 | 176.7 |
| $\angle(\text{C}^2-\text{Ir}-\text{N}^4)$ | 100.3 | 98.8  | 96.8  |
| $\angle(\text{C}^1-\text{Ir}-\text{C}^2)$ | 88.5  | 90.8  | 86.8  |
| $\angle(\text{N}^1-\text{Ir}-\text{N}^2)$ | 174.4 | 173.9 | 173.6 |
| $\angle(\text{N}^3-\text{Ir}-\text{N}^4)$ | 75.4  | 74.99 | 83.3  |

<sup>a</sup> 1  $E_h = 2625.500 \text{ kJ mol}^{-1}$

**Table S3.** List of selected molecular orbital energies [eV] for the complexes **1a–3b**, and HOMO–LUMO energy gap in vacuum.

| <b>orbital</b>   | <b>1a</b> | <b>2a</b> | <b>3a</b> |
|------------------|-----------|-----------|-----------|
| LUMO + 6         | −0.786    | −0.586    | −0.328    |
| LUMO + 5         | −0.941    | −1.082    | −0.739    |
| LUMO + 4         | −1.325    | −1.367    | −1.035    |
| LUMO + 3         | −1.534    | −1.725    | −1.270    |
| LUMO + 2         | −1.568    | −1.804    | −1.290    |
| LUMO + 1         | −1.971    | −1.932    | −1.710    |
| LUMO             | −2.088    | −2.266    | −1.915    |
| HOMO             | −5.506    | −5.933    | −5.988    |
| HOMO − 1         | −5.894    | −6.274    | −6.358    |
| HOMO − 2         | −5.950    | −6.419    | −6.430    |
| HOMO − 3         | −6.067    | −6.510    | −6.504    |
| HOMO − 4         | −6.228    | −6.766    | −6.574    |
| HOMO − 5         | −6.329    | −6.843    | −6.601    |
| HOMO − 6         | −6.556    | −6.923    | −6.690    |
| HOMO − 7         | −6.655    | −7.294    | −6.859    |
| HOMO − 8         | −6.698    | −7.723    | −7.048    |
| HOMO − 9         | −6.780    | −8.063    | −7.172    |
| HOMO − 10        | −6.812    | −8.103    | −7.354    |
| HOMO–LUMO<br>gap | 3.418     | 3.667     | 4.074     |

  

| <b>orbital</b>   | <b>1b</b> | <b>2b</b> | <b>3b</b> |
|------------------|-----------|-----------|-----------|
| LUMO + 6         | −1.017    | −0.849    | −0.773    |
| LUMO + 5         | −1.185    | −1.343    | −0.986    |
| LUMO + 4         | −1.556    | −1.638    | −1.297    |
| LUMO + 3         | −1.784    | −1.970    | −1.501    |
| LUMO + 2         | −1.845    | −2.079    | −1.543    |
| LUMO + 1         | −2.207    | −2.226    | −2.003    |
| LUMO             | −2.367    | −2.508    | −2.207    |
| HOMO             | −5.674    | −6.500    | −6.558    |
| HOMO − 1         | −6.114    | −6.584    | −6.705    |
| HOMO − 2         | −6.238    | −6.768    | −6.730    |
| HOMO − 3         | −6.369    | −6.894    | −6.812    |
| HOMO − 4         | −6.498    | −7.134    | −6.894    |
| HOMO − 5         | −6.732    | −7.220    | −6.910    |
| HOMO − 6         | −6.858    | −7.525    | −6.991    |
| HOMO − 7         | −6.921    | −7.713    | −7.226    |
| HOMO − 8         | −6.953    | −7.898    | −7.385    |
| HOMO − 9         | −7.049    | −8.126    | −7.560    |
| HOMO − 10        | −7.207    | −8.241    | −7.692    |
| HOMO–LUMO<br>gap | 3.307     | 3.992     | 4.351     |



**Table S4.** List of selected molecular orbital energies [eV] for the complexes **1a–3b**, and HOMO–LUMO energy gap in dichloromethane by continuum solvation model IEFPCM.

| <b>orbital</b>   | <b>1a</b> | <b>2a</b> | <b>3a</b> |
|------------------|-----------|-----------|-----------|
| LUMO + 6         | −0.761    | −0.672    | −0.440    |
| LUMO + 5         | −0.935    | −1.007    | −0.799    |
| LUMO + 4         | −1.080    | −1.098    | −0.976    |
| LUMO + 3         | −1.274    | −1.340    | −1.117    |
| LUMO + 2         | −1.580    | −1.686    | −1.525    |
| LUMO + 1         | −1.777    | −1.731    | −1.650    |
| LUMO             | −1.853    | −1.939    | −1.791    |
| HOMO             | −5.859    | −5.859    | −5.946    |
| HOMO − 1         | −6.270    | −6.299    | −6.310    |
| HOMO − 2         | −6.393    | −6.415    | −6.407    |
| HOMO − 3         | −6.442    | −6.522    | −6.528    |
| HOMO − 4         | −6.568    | −6.654    | −6.569    |
| HOMO − 5         | −6.694    | −6.825    | −6.818    |
| HOMO − 6         | −6.732    | −7.003    | −6.894    |
| HOMO − 7         | −6.809    | −7.319    | −7.095    |
| HOMO − 8         | −6.860    | −7.988    | −7.281    |
| HOMO − 9         | −7.012    | −8.033    | −7.480    |
| HOMO − 10        | −7.119    | −8.121    | −7.636    |
| HOMO–LUMO<br>gap | 4.006     | 3.920     | 4.155     |

  

| <b>orbital</b>   | <b>1b</b> | <b>2b</b> | <b>3b</b> |
|------------------|-----------|-----------|-----------|
| LUMO + 6         | −0.866    | −0.792    | −0.696    |
| LUMO + 5         | −1.071    | −1.158    | −0.915    |
| LUMO + 4         | −1.199    | −1.243    | −1.128    |
| LUMO + 3         | −1.393    | −1.439    | −1.275    |
| LUMO + 2         | −1.770    | −1.880    | −1.607    |
| LUMO + 1         | −1.910    | −1.921    | −1.852    |
| LUMO             | −2.020    | −2.054    | −1.995    |
| HOMO             | −6.329    | −6.410    | −6.441    |
| HOMO − 1         | −6.439    | −6.560    | −6.604    |
| HOMO − 2         | −6.601    | −6.689    | −6.742    |
| HOMO − 3         | −6.732    | −6.795    | −6.778    |
| HOMO − 4         | −6.784    | −6.915    | −6.843    |
| HOMO − 5         | −6.830    | −7.138    | −6.978    |
| HOMO − 6         | −6.932    | −7.403    | −7.149    |
| HOMO − 7         | −6.976    | −7.602    | −7.347    |
| HOMO − 8         | −7.062    | −8.127    | −7.554    |
| HOMO − 9         | −7.174    | −8.207    | −7.609    |
| HOMO − 10        | −7.567    | −8.214    | −7.732    |
| HOMO–LUMO<br>gap | 4.309     | 4.356     | 4.446     |

**Table S5** Computed excitation energies and oscillator strengths for the  $S_0 \rightarrow S_n$  ( $n = 1-40$ ) transitions of the complexes **1a-3b** in vacuum. Except for  $S_1$  transitions, only calculated excitations with  $f \geq 0.02$  are listed. Also, only single excitation configurations with the two highest contributions are reported, together with the corresponding nature of the involved orbitals.

|                       | <b>1a</b>                                                                 | <b>2a</b>                                                               | <b>3a</b>                                                              |
|-----------------------|---------------------------------------------------------------------------|-------------------------------------------------------------------------|------------------------------------------------------------------------|
| $\lambda$ [nm, eV]    | 427, 2.902 (0.001) ( $S_1$ )                                              | 415, 2.990 (0.002) ( $S_1$ )                                            | 374, 3.317 (0.02) ( $S_1$ )                                            |
| $f$                   | -0.413 HOMO $\rightarrow$ LUMO                                            | 0.702 HOMO $\rightarrow$ LUMO                                           | 0.688 HOMO $\rightarrow$ LUMO                                          |
| expansion coefficient | 0.569 HOMO $\rightarrow$ LUMO+1                                           |                                                                         |                                                                        |
|                       | 344, 3.603 (0.024)                                                        | 379, 3.269 (0.030)                                                      | 326, 3.804 (0.043)                                                     |
|                       | 0.667 HOMO-1 $\rightarrow$ LUMO+2                                         | 0.686 HOMO $\rightarrow$ LUMO+1                                         | 0.547 HOMO-2 $\rightarrow$ LUMO<br>0.332 HOMO-1 $\rightarrow$ LUMO     |
|                       | 319, 3.884 (0.028)                                                        | 329, 3.765 (0.051)                                                      | 309, 4.011 (0.032)                                                     |
|                       | 0.323 HOMO-5 $\rightarrow$ LUMO<br>0.295 HOMO-8 $\rightarrow$ LUMO        | 0.611 HOMO-1 $\rightarrow$ LUMO+1<br>-0.185 HOMO-4 $\rightarrow$ LUMO   | 0.485 HOMO-2 $\rightarrow$ LUMO+1<br>-0.276 HOMO $\rightarrow$ LUMO+3  |
|                       | 308, 4.022 (0.028)                                                        | 318, 3.901 (0.021)                                                      | 300, 4.135 (0.036)                                                     |
|                       | -0.299 HOMO-2 $\rightarrow$ LUMO+3<br>-0.299 HOMO-8 $\rightarrow$ LUMO+1  | 0.555 HOMO $\rightarrow$ LUMO+4<br>0.286 HOMO-3 $\rightarrow$ LUMO+1    | 0.476 HOMO-4 $\rightarrow$ LUMO<br>0.326 HOMO-3 $\rightarrow$ LUMO     |
|                       | 306, 4.056 (0.047)                                                        | 308, 4.030 (0.078)                                                      | 298, 4.159 (0.020)                                                     |
|                       | 0.341 HOMO-6 $\rightarrow$ LUMO+1<br>-0.319 HOMO-7 $\rightarrow$ LUMO+1   | -0.426 HOMO-2 $\rightarrow$ LUMO+1<br>0.351 HOMO-3 $\rightarrow$ LUMO+1 | 0.447 HOMO-5 $\rightarrow$ LUMO<br>-0.248 HOMO-3 $\rightarrow$ LUMO    |
|                       | 304, 4.083 (0.022)                                                        | 305, 4.067 (0.027)                                                      | 296, 4.196 (0.077)                                                     |
|                       | 0.336 HOMO-7 $\rightarrow$ LUMO+1<br>0.332 HOMO-10 $\rightarrow$ LUMO     | 0.454 HOMO-2 $\rightarrow$ LUMO+2<br>0.275 HOMO-6 $\rightarrow$ LUMO    | 0.327 HOMO-3 $\rightarrow$ LUMO+1<br>0.309 HOMO $\rightarrow$ LUMO+4   |
|                       | 299, 4.147 (0.029)                                                        | 289, 4.295 (0.033)                                                      | 285, 4.346 (0.052)                                                     |
|                       | -0.512 HOMO-11 $\rightarrow$ LUMO<br>0.227 HOMO-10 $\rightarrow$ LUMO     | 0.394 HOMO-4 $\rightarrow$ LUMO+2<br>0.358 HOMO-3 $\rightarrow$ LUMO+3  | 0.459 HOMO $\rightarrow$ LUMO+4<br>0.345 HOMO-4 $\rightarrow$ LUMO+1   |
|                       | 298, 4.161 (0.073)                                                        | 286, 4.330 (0.041)                                                      | 279, 4.445 (0.032)                                                     |
|                       | -0.533 HOMO-4 $\rightarrow$ LUMO+2<br>0.285 HOMO-5 $\rightarrow$ LUMO+2   | 0.449 HOMO-6 $\rightarrow$ LUMO+1<br>0.233 HOMO-1 $\rightarrow$ LUMO+4  | 0.369 HOMO $\rightarrow$ LUMO+5<br>0.273 HOMO-1 $\rightarrow$ LUMO+3   |
|                       | 296, 4.186 (0.020)                                                        | 280, 4.431 (0.034)                                                      | 272, 4.550 (0.135)                                                     |
|                       | -0.350 HOMO-10 $\rightarrow$ LUMO+1<br>-0.229 HOMO-7 $\rightarrow$ LUMO+1 | -0.365 HOMO-6 $\rightarrow$ LUMO+2<br>0.319 HOMO-1 $\rightarrow$ LUMO+4 | 0.338 HOMO-1 $\rightarrow$ LUMO+3<br>0.336 HOMO-2 $\rightarrow$ LUMO+3 |
|                       |                                                                           | 279, 4.448 (0.043)                                                      | 266, 4.654 (0.028)                                                     |

|                        |                        |
|------------------------|------------------------|
| 0.436 HOMO-6 → LUMO+2  | 0.493 HOMO-3 → LUMO+2  |
| 0.338 HOMO-1 → LUMO+4  | -0.343 HOMO-1 → LUMO+2 |
| 273, 4.536 (0.021)     | 265, 4.680 (0.020)     |
| 0.395 HOMO-2 → LUMO+4  | 0.312 HOMO-8 → LUMO    |
| 0.373 HOMO-3 → LUMO+4  | -0.291 HOMO-1 → LUMO+4 |
| 271, 4.572 (0.059)     | 262, 4.734 (0.021)     |
| -0.326 HOMO-7 → LUMO   | 0.374 HOMO-2 → LUMO+4  |
| -0.318 HOMO → LUMO+6   | -0.329 HOMO-4 → LUMO+2 |
| 270, 4.586 (0.032)     | 259, 4.783 (0.066)     |
| 0.435 HOMO-1 → LUMO+5  | 0.421 HOMO-4 → LUMO+2  |
| -0.274 HOMO → LUMO+6   | 0.257 HOMO-4 → LUMO+3  |
| 267, 4.638 (0.066)     | 256, 4.825 (0.155)     |
| 0.499 HOMO-6 → LUMO+3  | 0.361 HOMO-5 → LUMO+2  |
| -0.277 HOMO-7 → LUMO   | 0.343 HOMO-6 → LUMO+2  |
| 266, 4.662 (0.158)     | 256, 4.836 (0.025)     |
| 0.434 HOMO-3 → LUMO+4  | 0.382 HOMO-5 → LUMO+3  |
| -0.326 HOMO-2 → LUMO+4 | -0.309 HOMO-9 → LUMO   |
| 261, 4.752 (0.049)     | 250, 4.950 (0.070)     |
| 0.420 HOMO → LUMO+7    | 0.323 HOMO-3 → LUMO+4  |
| 0.308 HOMO → LUMO+10   | 0.273 HOMO → LUMO+7    |
| 257, 4.816 (0.053)     |                        |
| -0.346 HOMO-1 → LUMO+6 |                        |
| 0.284 HOMO-2 → LUMO+5  |                        |

---

*to be continued*

|                    | <b>1b</b>                            | <b>2b</b>                            | <b>3b</b>                            |
|--------------------|--------------------------------------|--------------------------------------|--------------------------------------|
| $\lambda$ [nm, eV] | 437, 2.835 (0.001) (S <sub>1</sub> ) | 368, 3.374 (0.008) (S <sub>1</sub> ) | 347, 3.577 (0.009) (S <sub>1</sub> ) |
| ( <i>f</i> )       | 0.591 HOMO → LUMO+1                  | 0.515 HOMO-1 → LUMO                  | 0.657 HOMO → LUMO                    |
| expansion          | -0.382 HOMO → LUMO                   | 0.460 HOMO → LUMO                    | 0.137 HOMO-6 → LUMO                  |
| coefficient        |                                      |                                      |                                      |
|                    | 314, 3.945 (0.063)                   | 345, 3.593 (0.021)                   | 318, 3.901 (0.038)                   |
|                    | -0.501 HOMO-8 → LUMO                 | 0.657 HOMO-1 → LUMO+1                | 0.383 HOMO-2 → LUMO                  |
|                    | -0.315 HOMO-10 → LUMO                | 0.174 HOMO-3 → LUMO+1                | -0.352 HOMO-5 → LUMO                 |
|                    | 302, 4.107 (0.025)                   | 333, 3.725 (0.025)                   | 312, 3.974 (0.026)                   |
|                    | -0.393 HOMO-6 → LUMO+1               | 0.601 HOMO-2 → LUMO                  | 0.514 HOMO-1 → LUMO+1                |
|                    | -0.373 HOMO-6 → LUMO                 | 0.267 HOMO-3 → LUMO                  | 0.282 HOMO-4 → LUMO+1                |
|                    | 298, 4.164 (0.025)                   | 331, 3.748 (0.033)                   | 298, 4.167 (0.054)                   |
|                    | -0.329 HOMO-8 → LUMO+1               | 0.447 HOMO-1 → LUMO+2                | 0.360 HOMO-3 → LUMO                  |
|                    | 0.298 HOMO-9 → LUMO+1                | -0.393 HOMO → LUMO+1                 | 0.322 HOMO-5 → LUMO                  |
|                    | 294, 4.212 (0.032)                   | 317, 3.910 (0.022)                   | 295, 4.198 (0.024)                   |
|                    | 0.372 HOMO-4 → LUMO+3                | 0.596 HOMO-4 → LUMO                  | 0.452 HOMO-6 → LUMO                  |
|                    | 0.316 HOMO-10 → LUMO                 | 0.278 HOMO-3 → LUMO                  | 0.257 HOMO-2 → LUMO+3                |
|                    | 289, 4.284 (0.090)                   | 308, 4.031 (0.022)                   | 291, 4.266 (0.056)                   |
|                    | 0.557 HOMO-5 → LUMO+2                | -0.568 HOMO-5 → LUMO                 | 0.473 HOMO-4 → LUMO+1                |
|                    | -0.250 HOMO-4 → LUMO+2               | 0.236 HOMO-2 → LUMO+1                | -0.247 HOMO-1 → LUMO+1               |
|                    | 286, 4.331 (0.040)                   | 305, 4.061 (0.087)                   | 281, 4.410 (0.067)                   |
|                    | -0.493 HOMO-10 → LUMO+1              | 0.415 HOMO-3 → LUMO+1                | 0.560 HOMO → LUMO+2                  |
|                    | 0.235 HOMO-8 → LUMO+1                | -0.390 HOMO-2 → LUMO +1              | -0.201 HOMO-4 → LUMO+2               |
|                    |                                      | 293, 4.226 (0.049)                   | 272, 4.550 (0.036)                   |
|                    |                                      | 0.588 HOMO-3 → LUMO+2                | 0.391 HOMO-1 → LUMO+3                |
|                    |                                      | -0.252 HOMO-4 → LUMO+2               | 0.377 HOMO-1 → LUMO+2                |
|                    |                                      | 287, 4.322 (0.064)                   | 271, 4.575 (0.051)                   |
|                    |                                      | 0.475 HOMO-4 → LUMO+2                | 0.341 HOMO-1 → LUMO+2                |
|                    |                                      | 0.222 HOMO-3 → LUMO+2                | -0.278 HOMO-5 → LUMO+2               |
|                    |                                      | 284, 4.371 (0.023)                   | 269, 4.615 (0.059)                   |
|                    |                                      | 0.418 HOMO-2 → LUMO+3                | -0.369 HOMO-2 → LUMO+2               |
|                    |                                      | 0.376 HOMO-4 → LUMO+3                | 0.314 HOMO-5 → LUMO+2                |

278, 4.456 (0.082)  
-0.338 HOMO → LUMO+4  
-0.323 HOMO-5 → LUMO+1

272, 4.559 (0.033)  
0.418 HOMO-5 → LUMO+3  
0.378 HOMO-4 → LUMO+3

268, 4.631 (0.037)  
-0.364 HOMO-5 → LUMO+3  
-0.278 HOMO-2 → LUMO+4

266, 4.657 (0.084)  
-0.410 HOMO-3 → LUMO+4  
-0.278 HOMO-6 → LUMO

263, 4.711 (0.176)  
-0.441 HOMO-2 → LUMO+4  
0.360 HOMO-3 → LUMO+4

257, 4.826 (0.026)  
-0.225 HOMO-5 → LUMO+10  
-0.213 HOMO-1 → LUMO+6

255, 4.863 (0.023)  
0.343 HOMO-6 → LUMO+2  
0.327 HOMO-7 → LUMO+2

253, 4.909 (0.046)  
0.270 HOMO-8 → LUMO  
-0.239 HOMO-4 → LUMO+10

267, 4.642 (0.043)  
0.573 HOMO → LUMO+4  
0.169 HOMO-1 → LUMO+4

260, 4.769 (0.024)  
-0.394 HOMO-3 → LUMO+3  
0.311 HOMO-4 → LUMO+2

259, 4.792 (0.080)  
0.387 HOMO-1 → LUMO+4  
0.300 HOMO-10 → LUMO

258, 4.808 (0.029)  
0.470 HOMO-4 → LUMO+3  
-0.252 HOMO-1 → LUMO+3

256, 4.845 (0.055)  
0.252 HOMO-2 → LUMO+4  
-0.252 HOMO-5 → LUMO+4

255, 4.857 (0.021)  
0.275 HOMO-2 → LUMO+4  
0.270 HOMO-3 → LUMO+2

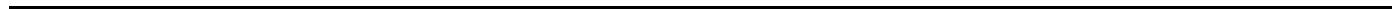

**Table S6.** Computed excitation energies and oscillator strengths for the  $S_0 \rightarrow S_n$  ( $n = 1-40$ ) transitions of the complexes **1a-3b** in dichloromethane. Except for  $S_1$  transitions, only calculated excitations with  $f \geq 0.04$  are listed. Also, only single excitation configurations with the two highest contributions are reported, together with the corresponding nature of the involved orbitals.

|                       | <b>1a</b>                          | <b>2a</b>                          | <b>3a</b>                         |
|-----------------------|------------------------------------|------------------------------------|-----------------------------------|
| $\lambda$ [nm, eV]    | 377, 3.287 (0.028) ( $S_1$ )       | 384, 3.227 (0.009) ( $S_1$ )       | 366, 3.388 (0.039) ( $S_1$ )      |
| $f$                   | 0.631 HOMO $\rightarrow$ LUMO      | 0.699 HOMO $\rightarrow$ LUMO      | 0.690 HOMO $\rightarrow$ LUMO     |
| expansion coefficient | -0.288 HOMO $\rightarrow$ LUMO+1   |                                    |                                   |
|                       | 320, 3.874 (0.045)                 | 367, 3.377 (0.057)                 | 321, 3.859 (0.043)                |
|                       | 0.399 HOMO-3 $\rightarrow$ LUMO    | 0.681 HOMO $\rightarrow$ LUMO+1    | 0.463 HOMO-2 $\rightarrow$ LUMO   |
|                       | 0.308 HOMO-4 $\rightarrow$ LUMO    | -0.122 HOMO $\rightarrow$ LUMO+2   | 0.369 HOMO-1 $\rightarrow$ LUMO   |
|                       | 315, 3.942 (0.041)                 | 325, 3.816 (0.047)                 | 314, 3.948 (0.058)                |
|                       | 0.374 HOMO-2 $\rightarrow$ LUMO    | 0.470 HOMO-2 $\rightarrow$ LUMO    | 0.523 HOMO-1 $\rightarrow$ LUMO+1 |
|                       | -0.372 HOMO-3 $\rightarrow$ LUMO+1 | -0.407 HOMO-1 $\rightarrow$ LUMO   | 0.308 HOMO-3 $\rightarrow$ LUMO+1 |
|                       | 303, 4.089 (0.047)                 | 313, 3.955 (0.060)                 | 307, 4.038 (0.044)                |
|                       | -0.323 HOMO-5 $\rightarrow$ LUMO+1 | 0.445 HOMO-1 $\rightarrow$ LUMO+1  | 0.574 HOMO-2 $\rightarrow$ LUMO+1 |
|                       | 0.250 HOMO-4 $\rightarrow$ LUMO+1  | -0.246 HOMO-4 $\rightarrow$ LUMO   | 0.226 HOMO-1 $\rightarrow$ LUMO   |
|                       | 301, 4.115 (0.095)                 | 304, 4.075 (0.042)                 | 296, 4.192 (0.044)                |
|                       | 0.428 HOMO-1 $\rightarrow$ LUMO+2  | 0.385 HOMO-2 $\rightarrow$ LUMO+2  | 0.595 HOMO-1 $\rightarrow$ LUMO+2 |
|                       | 0.418 HOMO $\rightarrow$ LUMO+4    | 0.355 HOMO $\rightarrow$ LUMO+4    | 0.284 HOMO-3 $\rightarrow$ LUMO+2 |
|                       | 298, 4.159 (0.064)                 | 296, 4.192 (0.076)                 | 291, 4.255 (0.201)                |
|                       | 0.391 HOMO-5 $\rightarrow$ LUMO    | 0.390 HOMO-3 $\rightarrow$ LUMO+2  | 0.384 HOMO $\rightarrow$ LUMO+3   |
|                       | 0.353 HOMO $\rightarrow$ LUMO+4    | -0.278 HOMO-4 $\rightarrow$ LUMO+2 | -0.346 HOMO-4 $\rightarrow$ LUMO  |
|                       | 291, 4.254 (0.057)                 | 294, 4.213 (0.060)                 | 290, 4.272 (0.055)                |
|                       | 0.426 HOMO-5 $\rightarrow$ LUMO+1  | 0.512 HOMO-3 $\rightarrow$ LUMO+1  | 0.522 HOMO-4 $\rightarrow$ LUMO+1 |
|                       | 0.260 HOMO-2 $\rightarrow$ LUMO+2  | -0.259 HOMO $\rightarrow$ LUMO+5   | -0.260 HOMO $\rightarrow$ LUMO+4  |
|                       | 286, 4.334 (0.069)                 | 289, 4.288 (0.128)                 | 285, 4.343 (0.050)                |
|                       | 0.317 HOMO-4 $\rightarrow$ LUMO+2  | 0.450 HOMO-4 $\rightarrow$ LUMO+2  | 0.519 HOMO $\rightarrow$ LUMO+4   |
|                       | -0.316 HOMO $\rightarrow$ LUMO+5   | -0.306 HOMO $\rightarrow$ LUMO+5   | 0.283 HOMO-4 $\rightarrow$ LUMO+1 |
|                       | 277, 4.476 (0.045)                 | 274, 4.517 (0.090)                 | 268, 4.625 (0.119)                |
|                       | 0.401 HOMO-6 $\rightarrow$ LUMO+1  | 0.436 HOMO-6 $\rightarrow$ LUMO    | 0.421 HOMO-2 $\rightarrow$ LUMO+3 |
|                       | -0.312 HOMO-8 $\rightarrow$ LUMO+1 | -0.400 HOMO-2 $\rightarrow$ LUMO+3 | 0.351 HOMO-1 $\rightarrow$ LUMO+3 |
|                       | 270, 4.597 (0.085)                 | 269, 4.606 (0.077)                 | 263, 4.712 (0.107)                |

|                                                                       |                                                                       |                                                                       |
|-----------------------------------------------------------------------|-----------------------------------------------------------------------|-----------------------------------------------------------------------|
| 0.406 HOMO-9 → LUMO<br>0.288 HOMO-2 → LUMO+3                          | 0.458 HOMO-1 → LUMO+4<br>-0.227 HOMO-4 → LUMO+3                       | 0.466 HOMO-1 → LUMO+4<br>0.329 HOMO-6 → LUMO+1                        |
| 263, 4.713 (0.083)<br>0.462 HOMO-10 → LUMO<br>0.275 HOMO-10 → LUMO+1  | 264, 4.679 (0.050)<br>0.329 HOMO-4 → LUMO+3<br>0.274 HOMO-3 → LUMO+3  | 262, 4.727 (0.047)<br>0.591 HOMO-6 → LUMO+1<br>-0.227 HOMO-2 → LUMO+4 |
| 261, 4.752 (0.106)<br>-0.396 HOMO-3 → LUMO+4<br>0.235 HOMO-5 → LUMO+3 | 262, 4.738 (0.076)<br>0.459 HOMO-6 → LUMO+2<br>0.286 HOMO-6 → LUMO+1  | 257, 4.816 (0.070)<br>-0.369 HOMO-6 → LUMO+2<br>0.327 HOMO-7 → LUMO   |
|                                                                       | 259, 4.793 (0.141)<br>0.372 HOMO-7 → LUMO<br>0.272 HOMO-1 → LUMO+4    | 254, 4.886 (0.071)<br>0.506 HOMO-7 → LUMO<br>0.307 HOMO-6 → LUMO+2    |
|                                                                       | 257, 4.826 (0.116)<br>0.347 HOMO-2 → LUMO+5<br>0.272 HOMO-7 → LUMO    | 253, 4.908 (0.080)<br>0.445 HOMO-4 → LUMO+3<br>-0.346 HOMO → LUMO+7   |
|                                                                       | 254, 4.885 (0.210)<br>-0.253 HOMO-1 → LUMO+5<br>0.222 HOMO-2 → LUMO+5 | 251, 4.933 (0.168)<br>0.418 HOMO-6 → LUMO+2<br>0.380 HOMO-7 → LUMO+2  |
|                                                                       | 251, 4.938 (0.129)<br>0.269 HOMO → LUMO+7<br>-0.249 HOMO-4 → LUMO+5   | 251, 4.945 (0.055)<br>0.537 HOMO-3 → LUMO+4<br>-0.332 HOMO-1 → LUMO+4 |

---

*to be continued*

|                       | <b>1b</b>                            | <b>2b</b>                            | <b>3b</b>                            |
|-----------------------|--------------------------------------|--------------------------------------|--------------------------------------|
| $\lambda$ [nm, eV]    | 346, 3.585 (0.022) (S <sub>1</sub> ) | 341, 3.635 (0.025) (S <sub>1</sub> ) | 339, 3.657 (0.020) (S <sub>1</sub> ) |
| ( <i>f</i> )          | 0.551 HOMO → LUMO                    | 0.653 HOMO → LUMO                    | 0.665 HOMO → LUMO                    |
| expansion coefficient | HOMO-1 → LUMO                        | -0.188 HOMO → LUMO+1                 | 0.164 HOMO-4 → LUMO                  |
|                       | 309, 4.010 (0.043)                   | 326, 3.806 (0.055)                   | 308, 4.027 (0.099)                   |
|                       | 0.366 HOMO-5 → LUMO                  | 0.590 HOMO-1 → LUMO                  | 0.470 HOMO-2 → LUMO                  |
|                       | -0.238 HOMO → LUMO                   | 0.336 HOMO-2 → LUMO                  | -0.412 HOMO-1 → LUMO+1               |
|                       | 294, 4.212 (0.060)                   | 313, 3.966 (0.052)                   | 297, 4.176 (0.056)                   |
|                       | 0.357 HOMO-7 → LUMO                  | 0.456 HOMO-2 → LUMO                  | 0.493 HOMO-3 → LUMO                  |
|                       | -0.280 HOMO-3 → LUMO                 | 0.358 HOMO-4 → LUMO                  | -0.349 HOMO-1 → LUMO                 |
|                       | 293, 4.224 (0.059)                   | 307, 4.035 (0.053)                   | 292, 4.248 (0.112)                   |
|                       | 0.401 HOMO-2 → LUMO+2                | 0.450 HOMO-1 → LUMO+1                | 0.617 HOMO-4 → LUMO                  |
|                       | -0.297 HOMO-5 → LUMO+1               | -0.383 HOMO-1 → LUMO+2               | -0.195 HOMO → LUMO+3                 |
|                       | 291, 4.256 (0.099)                   | 292, 4.253 (0.088)                   | 289, 4.294 (0.073)                   |
|                       | 0.400 HOMO-4 → LUMO+1                | 0.384 HOMO-3 → LUMO+1                | 0.531 HOMO-3 → LUMO+1                |
|                       | -0.259 HOMO-2 → LUMO+2               | 0.250 HOMO-2 → LUMO+1                | -0.350 HOMO-1 → LUMO+1               |
|                       | 283, 4.374 (0.119)                   | 288, 4.302 (0.065)                   | 284, 4.361 (0.104)                   |
|                       | -0.341 HOMO-6 → LUMO+1               | 0.373 HOMO-4 → LUMO+1                | 0.542 HOMO-1 → LUMO+2                |
|                       | 0.287 HOMO-7 → LUMO+1                | -0.258 HOMO → LUMO+3                 | 0.295 HOMO-3 → LUMO+2                |
|                       | 283, 4.388 (0.054)                   | 284, 4.368 (0.070)                   | 273, 4.539 (0.158)                   |
|                       | -0.362 HOMO-7 → LUMO+1               | 0.558 HOMO → LUMO+3                  | 0.603 HOMO → LUMO+3                  |
|                       | 0.307 HOMO → LUMO+3                  | 0.219 HOMO-4 → LUMO+2                | -0.181 HOMO-3 → LUMO+1               |
|                       | 280, 4.422 (0.050)                   | 277, 4.476 (0.093)                   | 266, 4.667 (0.047)                   |
|                       | -0.303 HOMO-6 → LUMO                 | 0.610 HOMO-5 → LUMO                  | 0.593 HOMO → LUMO+4                  |
|                       | -0.291 HOMO-3 → LUMO+2               | 0.189 HOMO-2 → LUMO+3                | 0.140 HOMO → LUMO+5                  |
|                       | 279, 4.452 (0.057)                   | 274, 4.524 (0.124)                   | 263, 4.707 (0.044)                   |
|                       | 0.375 HOMO-3 → LUMO+2                | 0.463 HOMO → LUMO+4                  | 0.495 HOMO-1 → LUMO+3                |
|                       | 0.320 HOMO-6 → LUMO+1                | 0.394 HOMO-1 → LUMO+3                | 0.262 HOMO-3 → LUMO+3                |
|                       | 261, 4.743 (0.056)                   | 262, 4.738 (0.052)                   | 258, 4.808 (0.055)                   |
|                       | 0.471 HOMO-1 → LUMO+1                | 0.473 HOMO-6 → LUMO                  | 0.487 HOMO-1 → LUMO+4                |
|                       | -0.233 HOMO-3 → LUMO+3               | 0.355 HOMO-2 → LUMO+3                | 0.257 HOMO-3 → LUMO+4                |



259, 4.792 (0.052)  
-0.266 HOMO-1 → LUMO+4  
0.234 HOMO-10 → LUMO

260, 4.774 (0.153)  
0.540 HOMO-1 → LUMO+5  
0.202 HOMO-2 → LUMO+5

258, 4.811 (0.071)  
-0.402 HOMO-6 → LUMO+2  
-0.372 HOMO-5 → LUMO+2

254, 4.888 (0.140)  
0.310 HOMO-4 → LUMO+3  
0.237 HOMO-6 → LUMO

256, 4.848 (0.043)  
-0.485 HOMO-9 → LUMO  
0.257 HOMO-2 → LUMO+4

251, 4.937 (0.051)  
-0.251 HOMO → LUMO+6  
0.248 HOMO-4 → LUMO+10

253, 4.898 (0.083)  
-0.319 HOMO-5 → LUMO+2  
-0.258 HOMO-7 → LUMO

247, 5.026 (0.080)  
-0.274 HOMO-7 → LUMO+2  
-0.243 HOMO-6 → LUMO+1

251, 4.937 (0.052)  
-0.323 HOMO → LUMO+6  
0.275 HOMO-3 → LUMO+3

250, 4.961 (0.061)  
0.366 HOMO-2 → LUMO+4  
-0.251 HOMO-7 → LUMO

---

**Table S7.** Computed excitation energies of the three lowest  $S_0 \rightarrow T_n$  transitions (where  $n = 1-3$ ) for the complexes **1a–3b** in vacuum. Also, only single excitation configurations with the highest contributions are reported, together with the nature of the involved orbitals.

|                       | <b>1a</b>                          | <b>2a</b>                          | <b>3a</b>                          |
|-----------------------|------------------------------------|------------------------------------|------------------------------------|
| $\lambda$ [nm, eV]    | 442, 2.803 (0.000) ( $T_1$ )       | 438, 2.829 (0.000) ( $T_1$ )       | 433, 2.864 (0.000) ( $T_1$ )       |
| $(f)^a$               | 0.449 HOMO-1 $\rightarrow$ LUMO    | 0.458 HOMO $\rightarrow$ LUMO+1    | 0.472 HOMO $\rightarrow$ LUMO      |
| expansion coefficient | 0.334 HOMO-6 $\rightarrow$ LUMO    | 0.262 HOMO-2 $\rightarrow$ LUMO+1  | 0.297 HOMO-1 $\rightarrow$ LUMO    |
|                       | 432, 2.872 (0.000) ( $T_2$ )       | 426, 2.908 (0.000) ( $T_2$ )       | 426, 2.913 (0.000) ( $T_2$ )       |
|                       | 0.568 HOMO $\rightarrow$ LUMO+1    | 0.353 HOMO $\rightarrow$ LUMO+2    | 0.453 HOMO $\rightarrow$ LUMO+1    |
|                       | -0.382 HOMO $\rightarrow$ LUMO     | -0.289 HOMO-2 $\rightarrow$ LUMO+2 | -0.312 HOMO-1 $\rightarrow$ LUMO+1 |
|                       | 426, 2.908 (0.000) ( $T_3$ )       | 417, 2.974 (0.000) ( $T_3$ )       | 374, 3.311 (0.000) ( $T_3$ )       |
|                       | 0.491 HOMO-1 $\rightarrow$ LUMO+2  | 0.649 HOMO $\rightarrow$ LUMO      | 0.458 HOMO $\rightarrow$ LUMO      |
|                       | -0.309 HOMO-5 $\rightarrow$ LUMO+2 | -0.136 HOMO $\rightarrow$ LUMO+1   | -0.313 HOMO-2 $\rightarrow$ LUMO   |
|                       | <b>1b</b>                          | <b>2b</b>                          | <b>3b</b>                          |
| $\lambda$ [nm, eV]    | 441, 2.809 (0.000) ( $T_1$ )       | 418, 2.969 (0.000) ( $T_1$ )       | 415, 2.984 (0.000) ( $T_1$ )       |
| $(f)^a$               | 0.597 HOMO $\rightarrow$ LUMO+1    | 0.420 HOMO-1 $\rightarrow$ LUMO+1  | 0.388 HOMO $\rightarrow$ LUMO      |
| expansion coefficient | -0.350 HOMO $\rightarrow$ LUMO     | 0.419 HOMO-2 $\rightarrow$ LUMO+1  | 0.306 HOMO-3 $\rightarrow$ LUMO    |
|                       | 419, 2.958 (0.000) ( $T_2$ )       | 410, 3.021 (0.000) ( $T_2$ )       | 411, 3.013 (0.000) ( $T_2$ )       |
|                       | -0.370 HOMO-8 $\rightarrow$ LUMO   | 0.387 HOMO-1 $\rightarrow$ LUMO+2  | 0.490 HOMO $\rightarrow$ LUMO+1    |
|                       | 0.319 HOMO-5 $\rightarrow$ LUMO    | -0.319 HOMO-2 $\rightarrow$ LUMO+2 | -0.237 HOMO-1 $\rightarrow$ LUMO+1 |
|                       | 417, 2.974 (0.000) ( $T_3$ )       | 400, 3.101 (0.000) ( $T_3$ )       | 350, 3.542 (0.000) ( $T_3$ )       |
|                       | 0.507 HOMO $\rightarrow$ LUMO      | 0.517 HOMO $\rightarrow$ LUMO      | 0.363 HOMO-4 $\rightarrow$ LUMO    |
|                       | 0.287 HOMO $\rightarrow$ LUMO+1    | -0.277 HOMO-6 $\rightarrow$ LUMO   | -0.244 HOMO $\rightarrow$ LUMO     |

<sup>a</sup> TD-DFT calculations performed with Gaussian09 neglect intersystem crossing processes, which mix states of the singlet and triplet manifolds. For this reason, the computed oscillator strengths for triplet excitation transitions are equal to zero.

**Table S8.** Computed excitation energies of the three lowest  $S_0 \rightarrow T_n$  transitions (where  $n = 1-3$ ) for the complexes **1a-3b** in dichloromethane. Also, only single excitation configurations with the highest contributions are reported, together with the nature of the involved orbitals.

|                       | <b>1a</b>                          | <b>2a</b>                         | <b>3a</b>                         |
|-----------------------|------------------------------------|-----------------------------------|-----------------------------------|
| $\lambda$ [nm, eV]    | 432, 2.867 (0.000) ( $T_1$ )       | 430, 2.881 (0.000) ( $T_1$ )      | 429, 2.891 (0.000) ( $T_1$ )      |
| $(f)^a$               | 0.351 HOMO $\rightarrow$ LUMO+1    | 0.443 HOMO $\rightarrow$ LUMO+1   | 0.478 HOMO $\rightarrow$ LUMO     |
| expansion coefficient | -0.331 HOMO $\rightarrow$ LUMO     | 0.292 HOMO-1 $\rightarrow$ LUMO+1 | 0.280 HOMO-1 $\rightarrow$ LUMO+1 |
|                       | 424, 2.922 (0.000) ( $T_2$ )       | 425, 2.918 (0.000) ( $T_2$ )      | 424, 2.924 (0.000) ( $T_2$ )      |
|                       | 0.459 HOMO $\rightarrow$ LUMO+2    | 0.438 HOMO $\rightarrow$ LUMO+2   | 0.431 HOMO $\rightarrow$ LUMO+1   |
|                       | 0.324 HOMO-1 $\rightarrow$ LUMO+2  | 0.294 HOMO-2 $\rightarrow$ LUMO+2 | 0.349 HOMO-1 $\rightarrow$ LUMO   |
|                       | 389, 3.191 (0.000) ( $T_3$ )       | 386, 3.209 (0.000) ( $T_3$ )      | 366, 3.391 (0.000) ( $T_3$ )      |
|                       | 0.332 HOMO $\rightarrow$ LUMO      | 0.630 HOMO $\rightarrow$ LUMO     | 0.443 HOMO $\rightarrow$ LUMO     |
|                       | 0.256 HOMO $\rightarrow$ LUMO+1    | 0.116 HOMO-6 $\rightarrow$ LUMO   | -0.331 HOMO-2 $\rightarrow$ LUMO  |
|                       | <b>1b</b>                          | <b>2b</b>                         | <b>3b</b>                         |
| $\lambda$ [nm, eV]    | 413, 2.999 (0.000) ( $T_1$ )       | 412, 3.009 (0.000) ( $T_1$ )      | 412, 3.006 (0.000) ( $T_1$ )      |
| $(f)^a$               | 0.339 HOMO-2 $\rightarrow$ LUMO    | 0.358 HOMO $\rightarrow$ LUMO+1   | 0.440 HOMO $\rightarrow$ LUMO     |
| expansion coefficient | -0.270 HOMO $\rightarrow$ LUMO     | 0.293 HOMO-1 $\rightarrow$ LUMO+1 | 0.299 HOMO-1 $\rightarrow$ LUMO   |
|                       | 410, 3.022 (0.000) ( $T_2$ )       | 409, 3.033 (0.000) ( $T_2$ )      | 410, 3.024 (0.000) ( $T_2$ )      |
|                       | 0.447 HOMO $\rightarrow$ LUMO+2    | 0.380 HOMO $\rightarrow$ LUMO+2   | 0.442 HOMO $\rightarrow$ LUMO+1   |
|                       | 0.265 HOMO-2 $\rightarrow$ LUMO+2  | 0.265 HOMO-2 LUMO+2               | -0.335 HOMO-1 $\rightarrow$ LUMO  |
|                       | 384, 3.229 (0.000) ( $T_3$ )       | 380, 3.263 (0.000) ( $T_3$ )      | 345, 3.593 (0.000) ( $T_3$ )      |
|                       | -0.326 HOMO-3 $\rightarrow$ LUMO+1 | 0.312 HOMO-2 $\rightarrow$ LUMO   | 0.344 HOMO-3 $\rightarrow$ LUMO   |
|                       | 0.238 HOMO $\rightarrow$ LUMO+1    | -0.304 HOMO-5 $\rightarrow$ LUMO  | 0.293 HOMO-2 $\rightarrow$ LUMO   |

<sup>a</sup> TD-DFT calculations performed with Gaussian09 neglect intersystem crossing processes, which mix states of the singlet and triplet manifolds. For this reason, the computed oscillator strengths for triplet excitation transitions are equal to zero.

**Table S9.** Computed excitation energies and oscillator strengths for the  $S_0 \rightarrow S_n$  ( $n = 1-40$ ) transitions of the complexes **1a** in ethanol and *N,N'*-dimethylformamide. Except for  $S_1$  transitions, only calculated excitations with  $f \geq 0.04$  are listed.

|                               | <i>ethanol</i>               | <i>N,N'</i> -dimethylformamide |
|-------------------------------|------------------------------|--------------------------------|
| $\lambda$ [nm, eV]<br>( $f$ ) | 374, 3.315 (0.027) ( $S_1$ ) | 373, 3.319 (0.029) ( $S_1$ )   |
| expansion<br>coefficient      | 318, 3.893 (0.046)           | 318, 3.897 (0.051)             |
|                               | 301, 4.113 (0.122)           | 301, 4.113 (0.113)             |
|                               | 296, 4.185 (0.078)           | 296, 4.187 (0.085)             |
|                               | 294, 4.216 (0.041)           | 294, 4.215 (0.043)             |
|                               | 290, 4.288 (0.045)           | 290, 4.277 (0.062)             |
|                               | 289, 4.288 (0.049)           | 288, 4.299 (0.064)             |
|                               | 287, 4.321 (0.055)           | 283, 4.379 (0.056)             |
|                               | 284, 4.365 (0.048)           | 280, 4.435 (0.058)             |
|                               | 280, 4.433 (0.051)           | 269, 4.602 (0.111)             |
|                               | 270, 4.597 (0.099)           | 260, 4.772 (0.208)             |
|                               | 260, 4.770 (0.207)           | 257, 4.817 (0.047)             |
|                               | 258, 4.812 (0.044)           |                                |

**Table S10.** Computed excitation energies of the three lowest  $S_0 \rightarrow T_n$  transitions (where  $n = 1-3$ ) for the complexes **1a** in ethanol and *N,N'*-dimethylformamide.

|                                                 | <i>ethanol</i>                       | <i>N,N'</i> -dimethylformamide       |
|-------------------------------------------------|--------------------------------------|--------------------------------------|
| $\lambda$ [nm, eV]<br>( <i>f</i> ) <sup>a</sup> | 431, 2.874 (0.000) (T <sub>1</sub> ) | 431, 2.876 (0.000) (T <sub>1</sub> ) |
| expansion<br>coefficient                        | 424, 2.923 (0.000) (T <sub>2</sub> ) | 424, 2.924 (0.000) (T <sub>2</sub> ) |
|                                                 | 388, 3.199 (0.000) (T <sub>3</sub> ) | 387, 3.201 (0.000) (T <sub>3</sub> ) |

<sup>a</sup> TD-DFT calculations performed with Gaussian09 neglect intersystem crossing processes, which mix states of the singlet and triplet manifolds. For this reason, the computed oscillator strengths for triplet excitation transitions are equal to zero.
